# Supplementary material
Source: PubMed Central journal article supplement (PMC2206123)

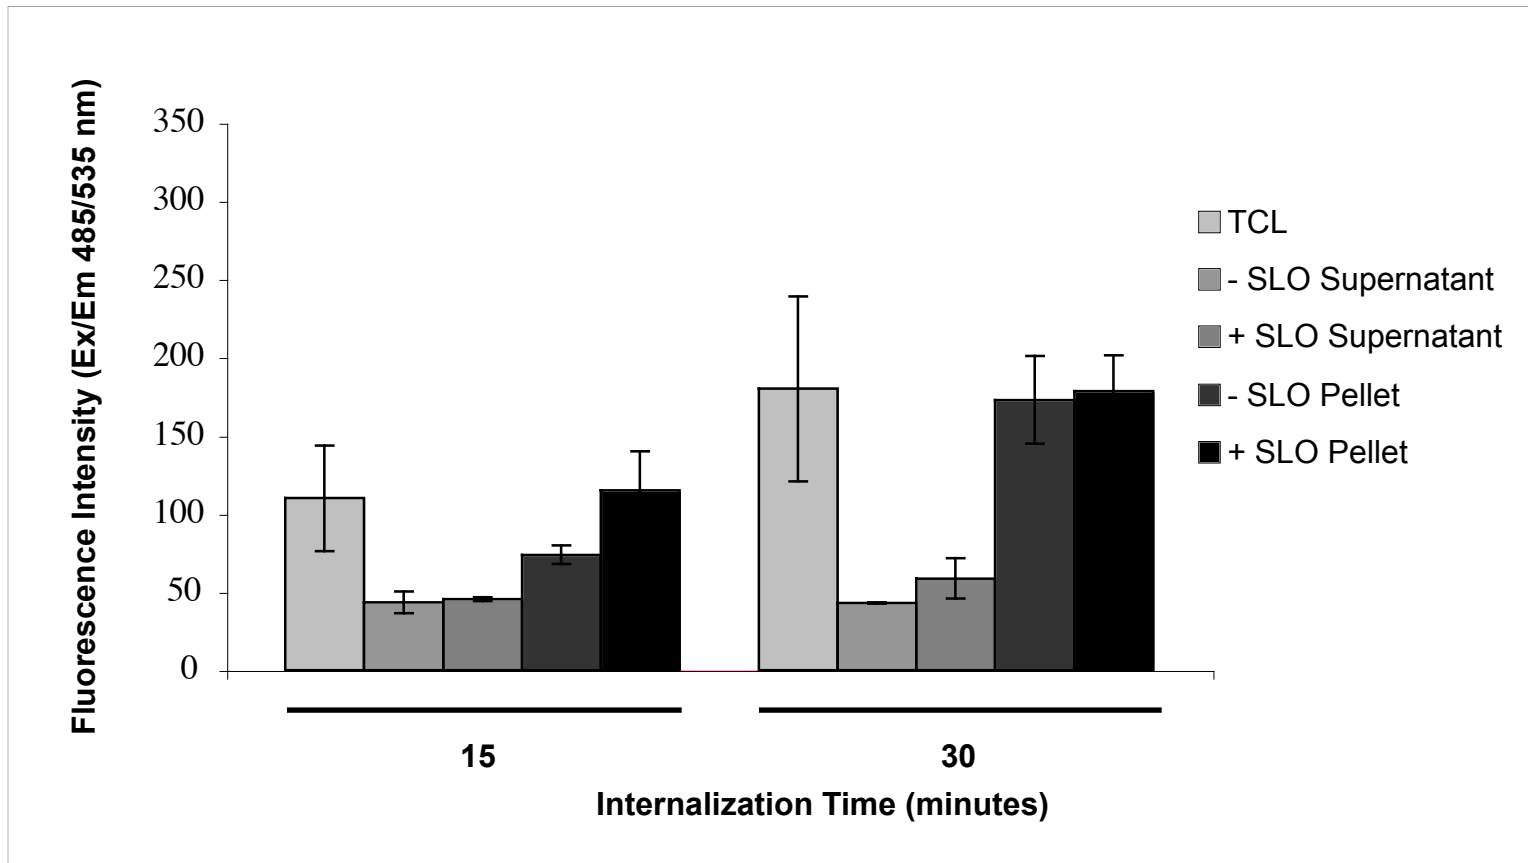

Supplement: 7601941s1.pdf [file 7601941s1.pdf]

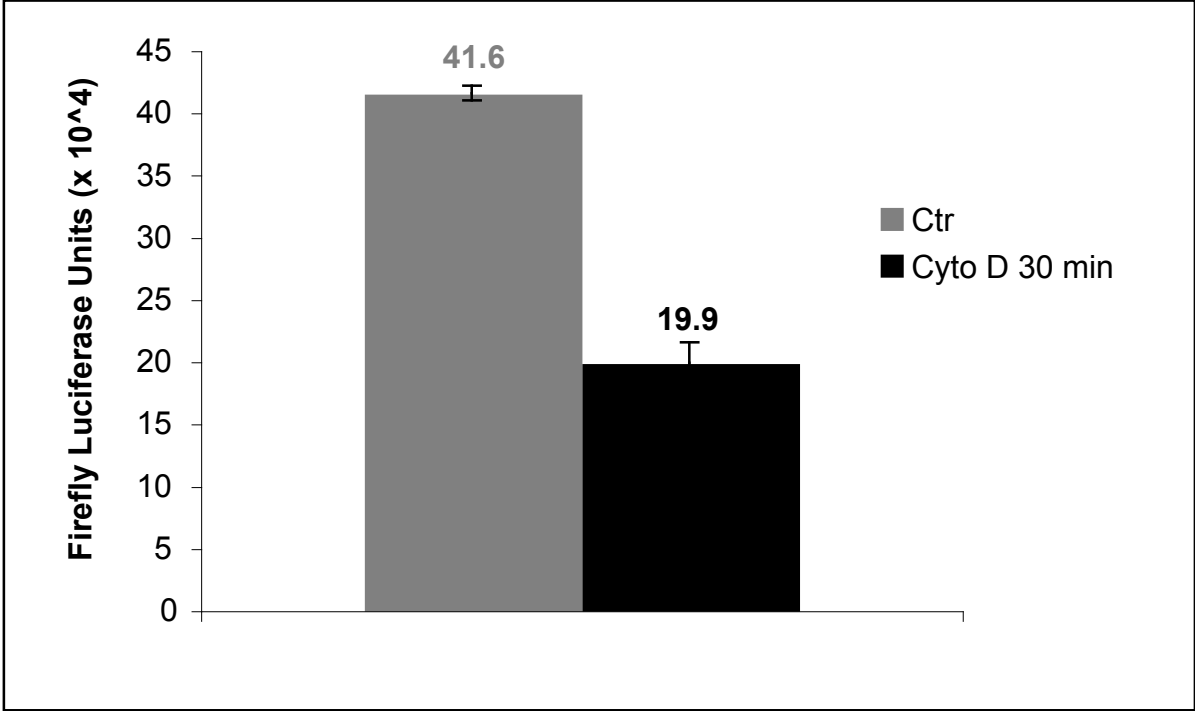

Giodini A Supplemental Figure 2

Supplement: 7601941s2.pdf [file 7601941s2.pdf]

**A**

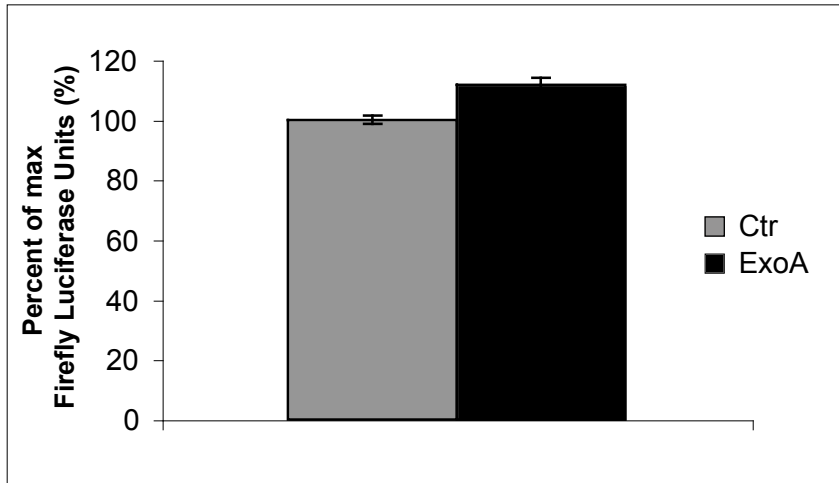

**B**

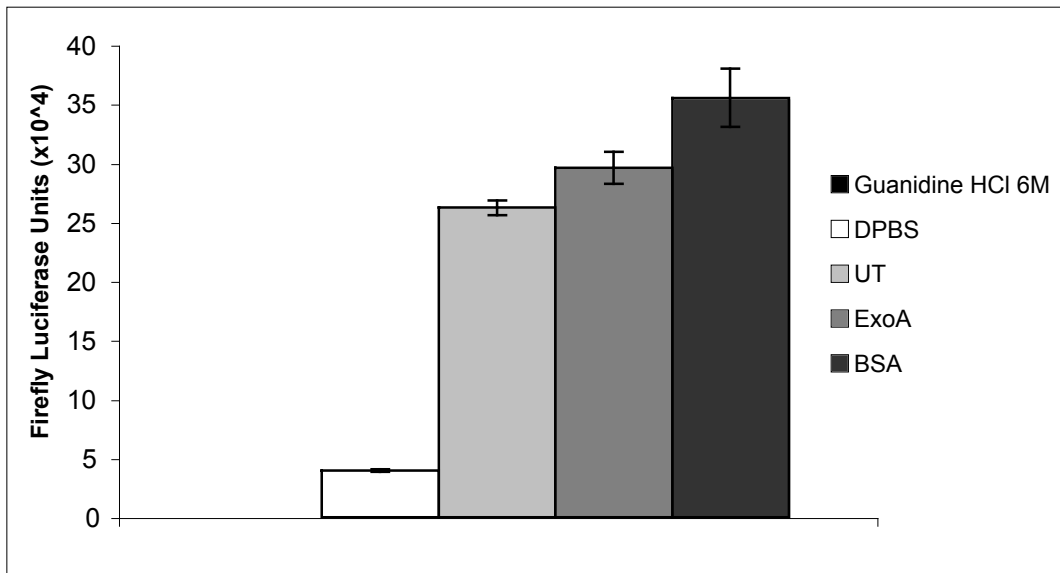

Supplement: 7601941s3.pdf [file 7601941s3.pdf]

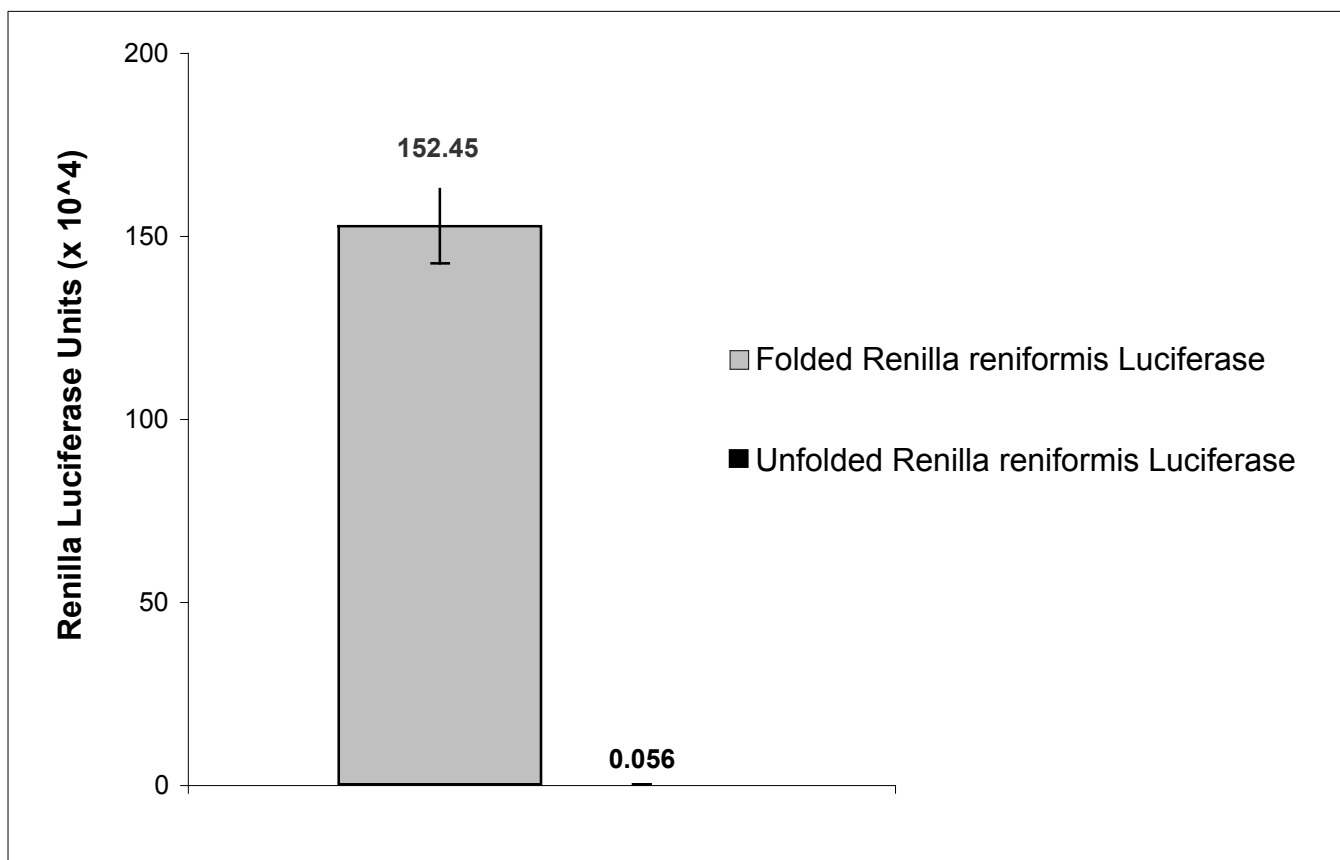

Supplement: 7601941s4.pdf [file 7601941s4.pdf]

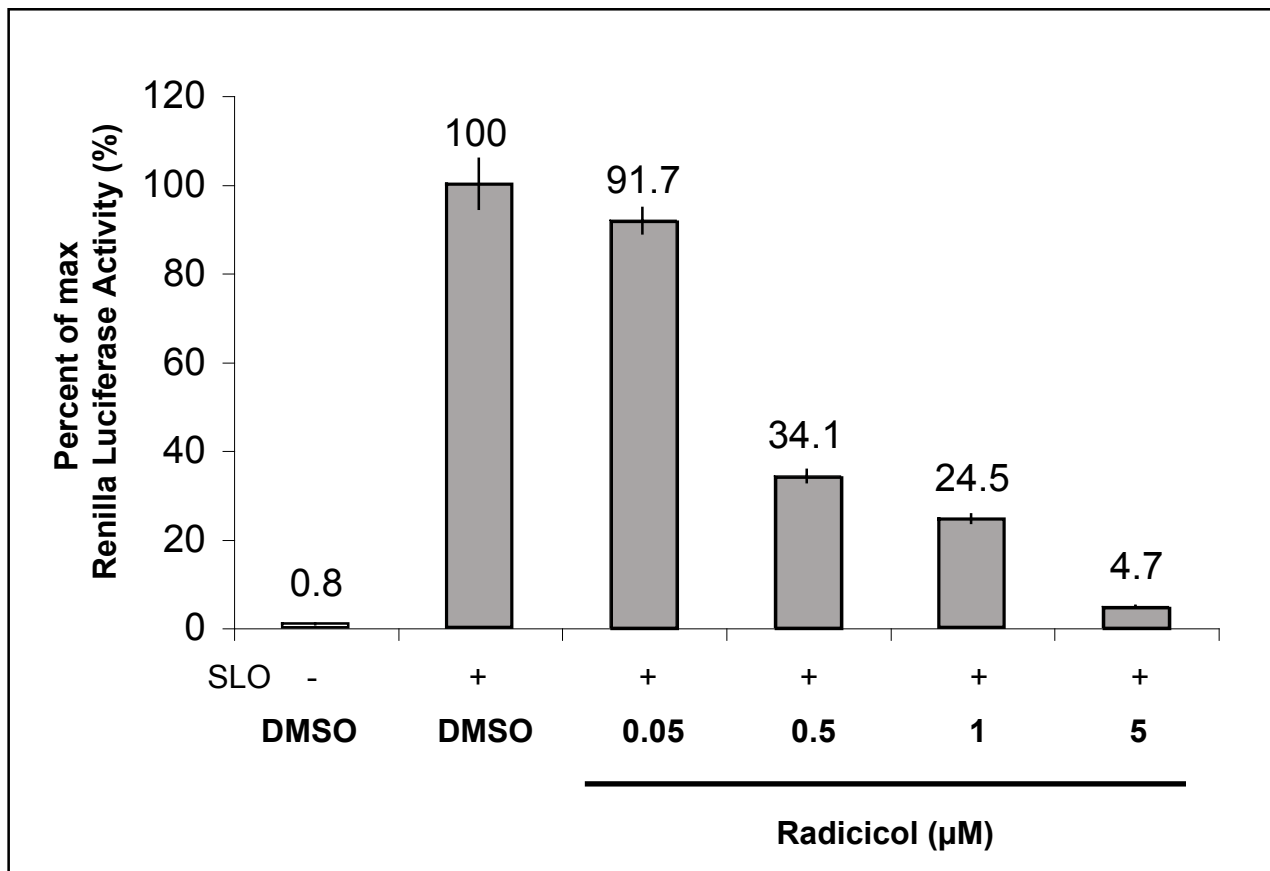

Supplement: 7601941s5.pdf [file 7601941s5.pdf]

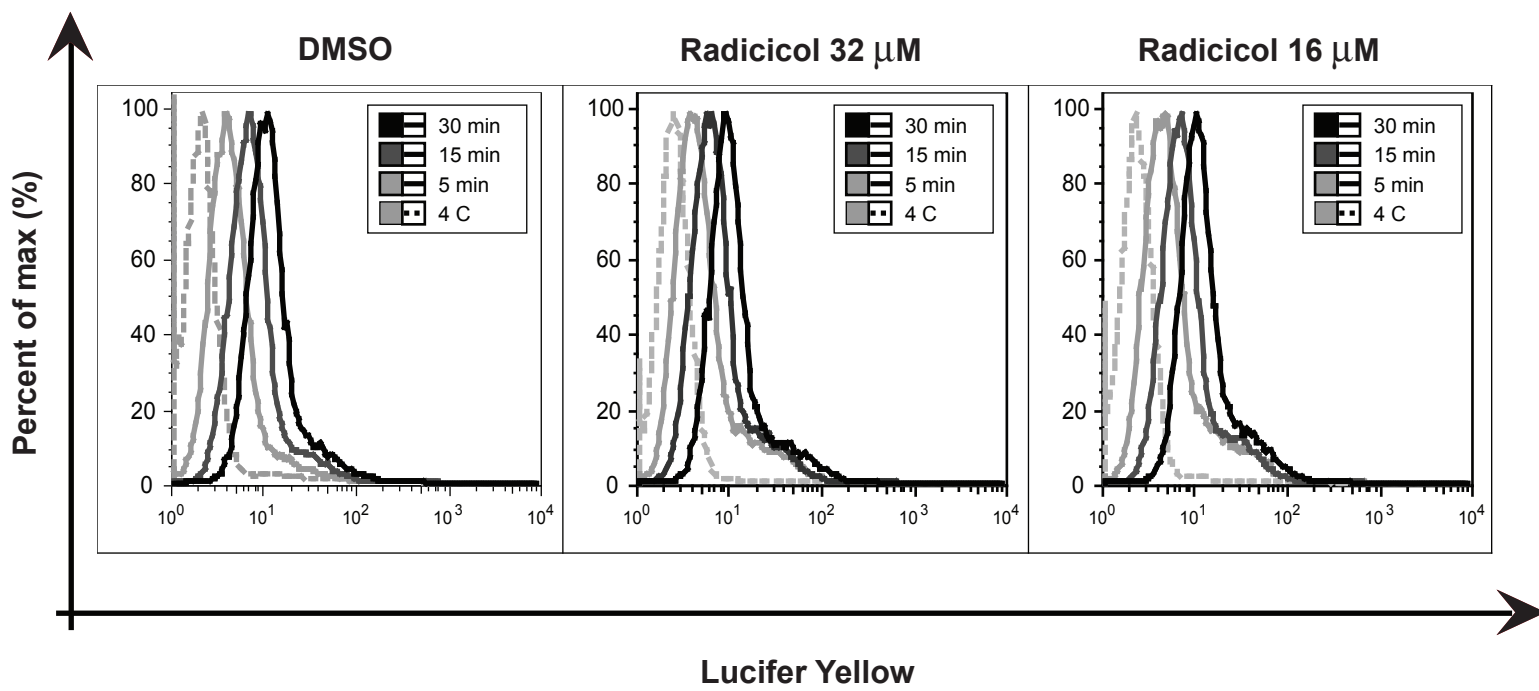

Supplement: 7601941s6.pdf [file 7601941s6.pdf]

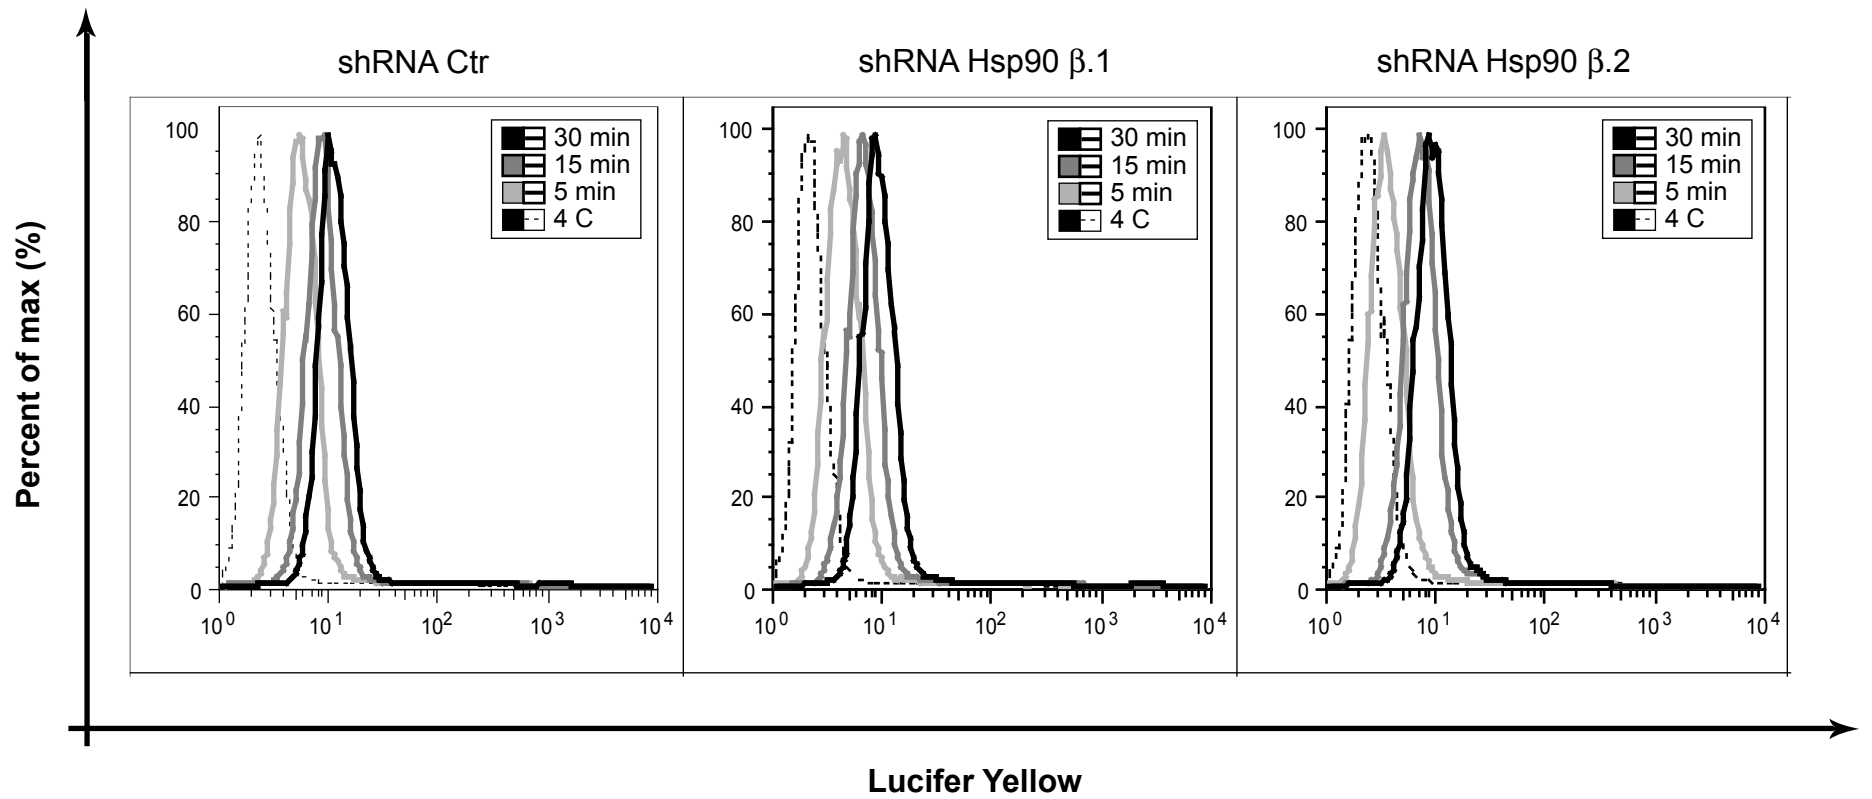

Supplement: 7601941s7.pdf [file 7601941s7.pdf]
